# Supplementary material for: Bedside Shift Handover in Open-Box ICUs: Nursing Perspectives and Challenges from a Focus Group Study
Source: Research Square preprint supplement (doi:10.21203/rs.3.rs-6136762/v1), 2025-03-06
Supplement: Supplementary file 1 [file e529a90f3919487503534897.docx]

| **COREQ Item** | **Description** | **Manuscript Section** |
| --- | --- | --- |
| 1. Credentials | Researcher qualifications and affiliations | Title page - Author details |
| 2. Occupation | Researchers’ professional roles | Title page - Author details |
| 3. Gender | Gender of the research team | Methods - Research Team |
| 4. Experience and Training | Researchers' background in qualitative research | Methods - Rigor |
| 5. Relationship with Participants | Pre-existing relationships with participants | Methods - Participants |
| 6. Researcher Influence | Reflexivity and potential bias | Methods - Rigor |
| 7. Theoretical Framework | Framework guiding the study | Introduction |
| 8. Participant Selection | Criteria for participant selection | Methods - Participants |
| 9. Sampling Method | Description of sampling strategy | Methods - Participants |
| 10. Approach | How participants were contacted | Methods - Recruitment |
| 11. Participant Information | Information provided to participants | Methods - Ethics |
| 12. Informed Consent | Whether consent was obtained | Methods - Ethics |
| 13. Interview Guide | Description of questions asked | Methods - Data Collection (Table 2) |
| 14. Recording | Whether interviews were recorded | Methods - Data Collection |
| 15. Interview Duration | Length of interviews | Methods - Data Collection |
| 16. Repeat Interviews | Whether interviews were repeated | Methods - Data Collection |
| 17. Transcription | Process of transcribing data | Methods - Data Analysis |
| 18. Participant Validation | Whether findings were reviewed by participants | Methods - Rigor |
| 19. Data Coding | How data was coded | Methods - Data Analysis |
| 20. Software | Whether software was used | Methods - Data Analysis (Now specified) |
| 21. Triangulation | Multiple researchers verifying findings | Methods - Rigor |
| 22. Data Saturation | Whether data saturation was achieved | Methods - Participants |
| 23. Participant Representation | Use of direct quotes | Results - Findings |
| 24. Summary of Findings | Overview of key results | Results - Discussion |
| 25. Emergent Themes | Identification of main themes | Results - Findings (Table 3) |
| 26. Clarity of Findings | Coherent and structured presentation | Results - Discussion |
| 27. Reflexivity | Consideration of researcher influence | Methods - Rigor |
| 28. Study Limitations | Acknowledgment of study constraints | Discussion - Limitations |
| 29. Transferability | Applicability of findings to other contexts | Discussion - Implications |
| 30. Findings Verification | Whether findings were reviewed for accuracy | Methods - Rigor |
| 31. Contribution to Knowledge | How the study advances the field | Discussion - Contributions |
| 32. Ethical Considerations | Approval and participant confidentiality | Methods - Ethics |
